# Supplementary material for: Enhanced Magnetic Hyperthermia Performance of Zinc Ferrite Nanoparticles under a Parallel and a Transverse Bias DC Magnetic Field
Source: MDPI journal article supplement (doi:10.3390/nano12203578), 2022-10-12
Supplement: s1 [file s1]

## Supplementary Materials

# Enhanced magnetic hyperthermia performance of zinc ferrites nanoparticles under a parallel and a transverse bias DC magnetic field

Constantin Mihai Lucaciu<sup>1\*</sup>, Stefan Nitica<sup>1</sup>, Ionel Fizesan<sup>2</sup>, Lorena Filip<sup>3</sup>, Liviu Bilteanu<sup>4,5</sup> and Cristian Iacovita<sup>1\*</sup>

<sup>1</sup> Department of Pharmaceutical Physics-Biophysics, Faculty of Pharmacy, "Iuliu Hațieganu" University of Medicine and Pharmacy, 6 Pasteur St., 400349 Cluj-Napoca, Romania

<sup>2</sup> Department of Toxicology, Faculty of Pharmacy, "Iuliu Hațieganu" University of Medicine and Pharmacy, 6A Pasteur St., 400349 Cluj-Napoca, Romania

<sup>3</sup> Department of Bromatology, Hygiene, Nutrition, "Iuliu Hațieganu" University of Medicine and Pharmacy, 6 Pasteur St., 400349 Cluj-Napoca, Romania

<sup>4</sup> University of Agronomic Sciences and Veterinary Medicine of Bucharest, Faculty of Veterinary Medicine, Department Preclinical Sciences, 105 Splaiul Independentei, 050097, Bucharest, Romania

<sup>5</sup> Molecular Nanotechnology Laboratory, National Institute for Research and Development in Microtechnologies, 126A Erou Iancu Nicolae St., 077190, Bucharest, Romania

\* Correspondence: clucaciu@umfcluj.ro (C.M.L.); cristian.iacovita@umfcluj.ro (C.I.); Tel.: +0040-744-647-854 (C.M.L.); +0040-743-421-247 (C.I.)

## S1. Physicochemical characterization of Zn ferrites:

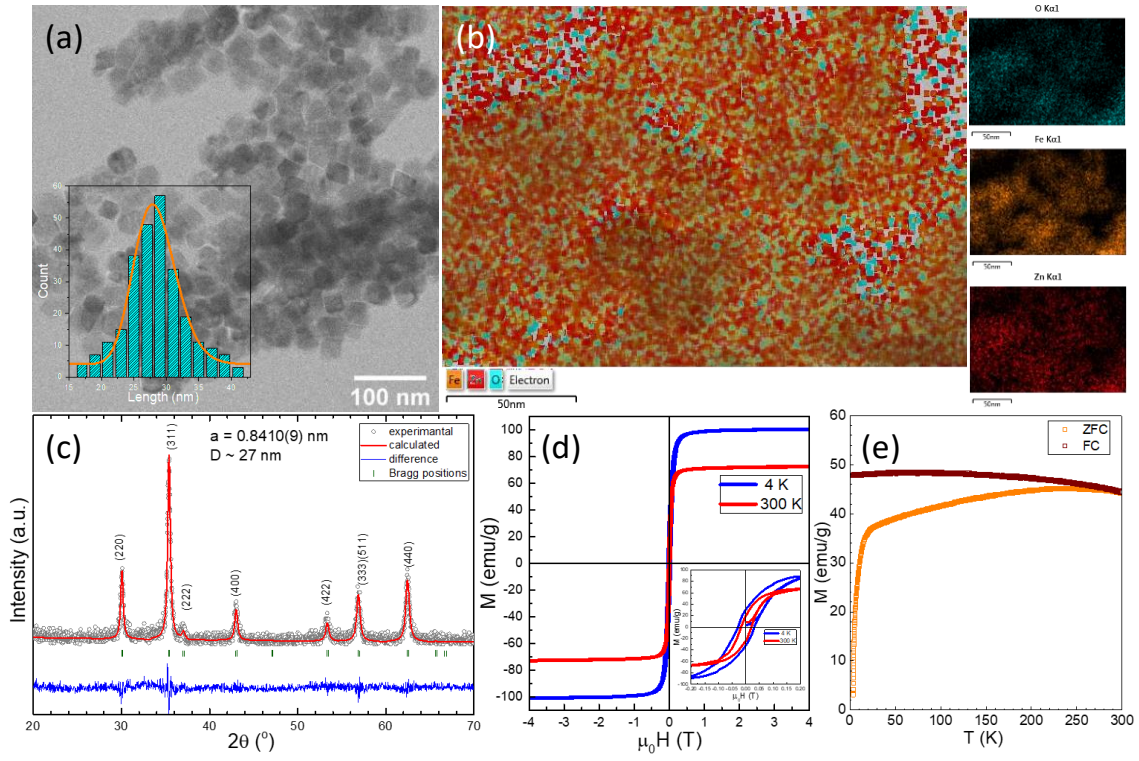

**Figure S1.** (a) TEM images of Zn ferrites NPs. Inset represents the size distribution histogram of Zn ferrites NPs fitted to a log-normal distribution (orange line). (b) EDX global chemical map together with chemical maps of Fe, Zn, and O elements of Zn ferrites NPs. (c) XRD diffraction pattern of Zn ferrites NPs. (d) Hysteresis loops of Zn ferrites NPs acquired at 4 K and 300 K. Inset represents the low-field regime of hysteresis loops. (e) Zero field cooled and field cooled magnetization curves of Zn ferrites NPs acquired in an external magnetic field of 50 mT.

## S2. Heating curves for the samples dispersed in water with and without the static DC field

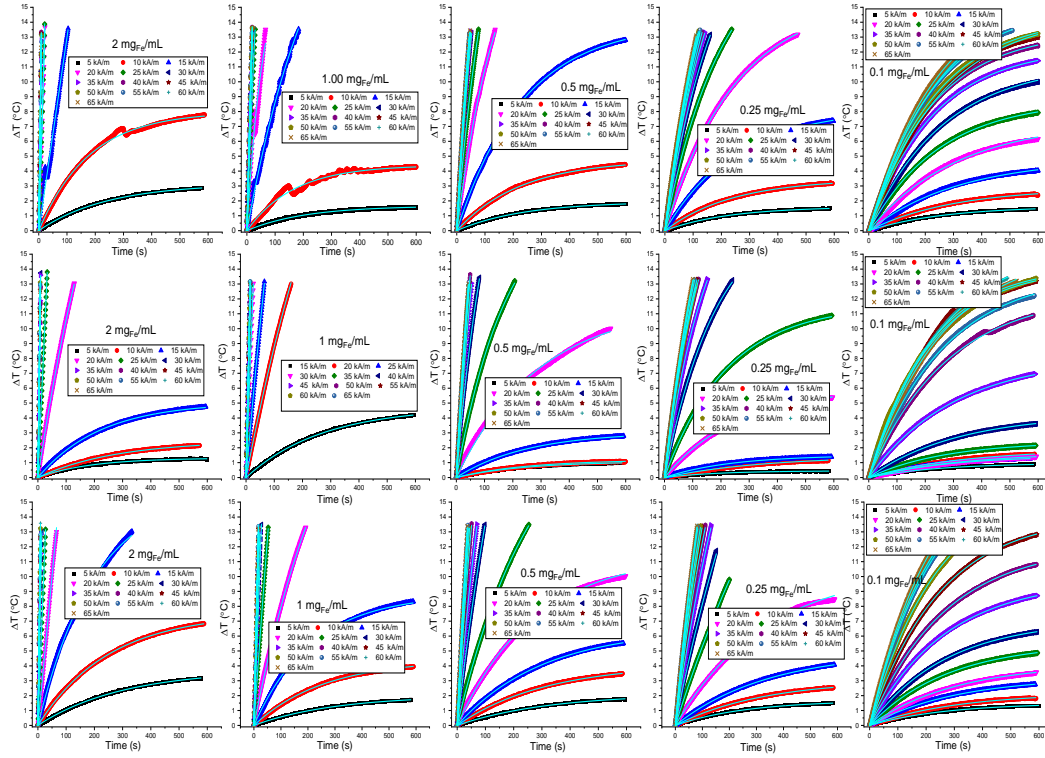

**Figure S2** Groups of panels displaying the temperature change  $\Delta T$  versus time curves fitted with Box-Lucas equation (blue curves) of  $\text{Zn}_{0.4}\text{Fe}_{2.6}\text{O}_4$  NPs, dispersed in water without an applied  $H_{DC}$  (upper panels) and with an  $H_{DC}$  of 10 kA/m applied (middle panels) and perpendicular (lower panels), at an iron concentration ranging from 2.00 mgFe/mL to 0.1 mgFe/mL, recorded as a function of  $H$  (5 – 65 kA/m) at a frequency of 355 kHz.

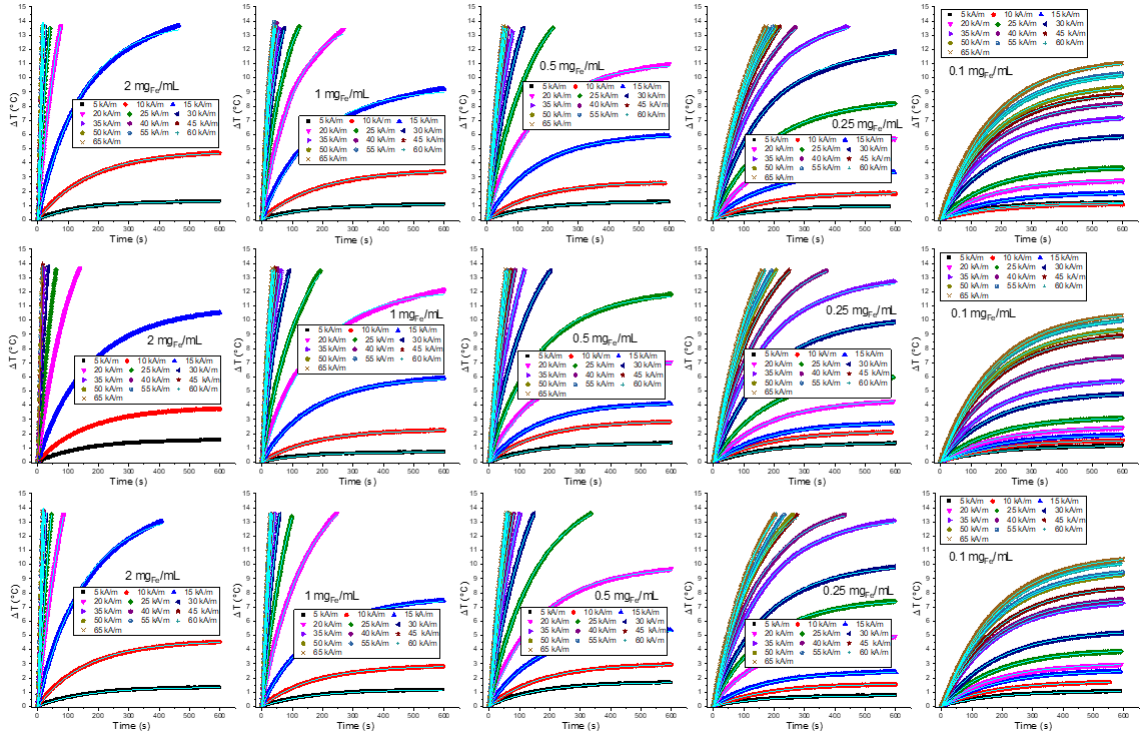

**Figure S3** Groups of panels displaying the temperature change  $\Delta T$  versus time curves fitted with Box-Lucas equation (blue curves) of  $\text{Zn}_{0.4}\text{Fe}_{2.6}\text{O}_4$  NPs, dispersed in PEG 8K without an applied HDC (upper panels) and with an HDC of 10 kA/m applied parallel (middle panels) and perpendicular (lower panels), at an iron concentration ranging from 2.00 mgFe/mL to 0.1 mgFe/mL, recorded as a function of  $H$  (5 – 65 kA/m) at a frequency of 355 kHz.

### S3. Pre-alignment of the Zn ferrites NPs in liquid PEG 8K:

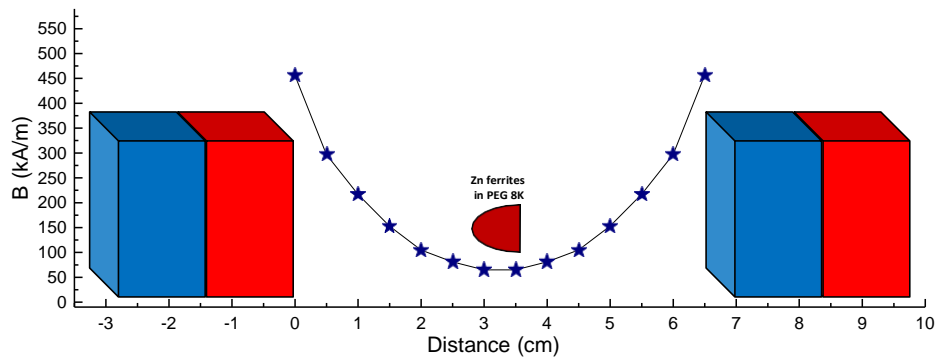

**Figure S4.** Schematic representation of setup used for the pre-alignment of the Zn ferrites in liquid PEG 8K at 80°C under a magnetic field of 65 kA/m, maximum attainable in MH experiments.

#### S4. $H_{DC}$ configurations superposed on the AMF:

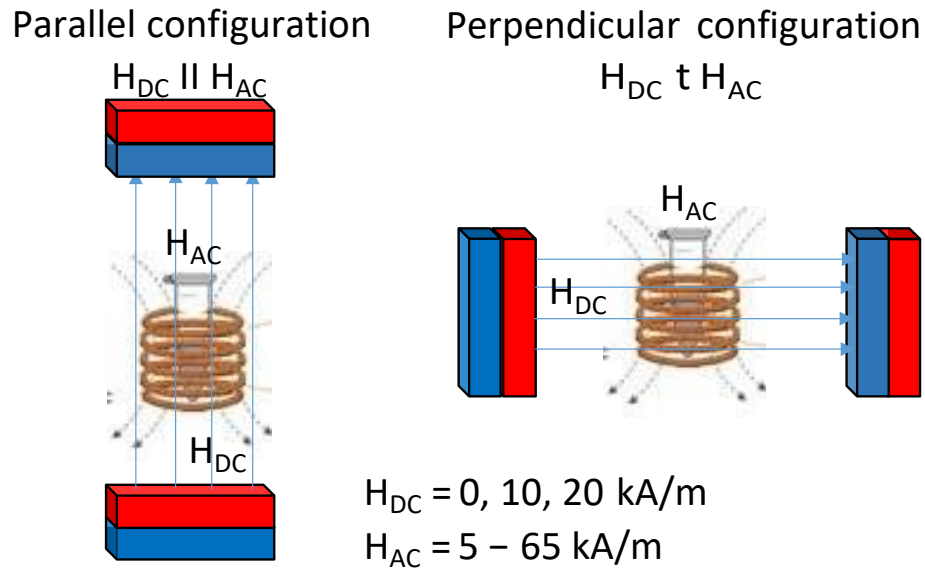

**Figure S5.** Experimental setup to superpose an  $H_{DC}$  over the AMF during MH measurements.

#### S5. Fitting parameters of the MH data acquired in water and PEG 8K:

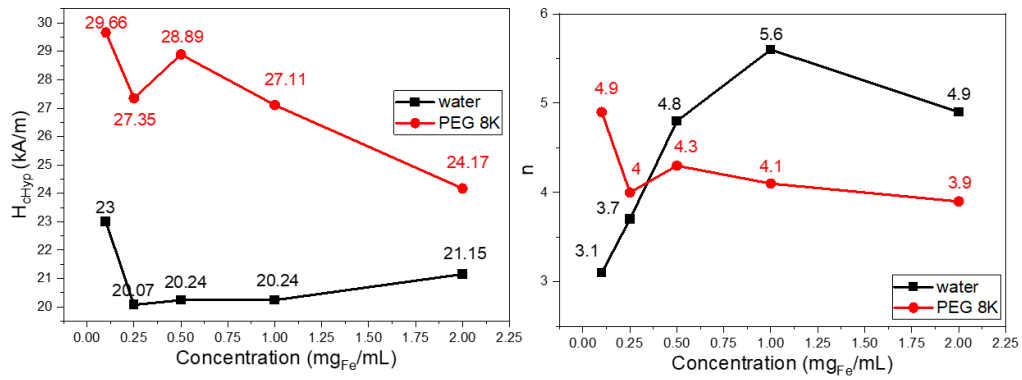

**Figure S6.**  $H_{chyp}$  (left) and  $n$  (right) dependence on the concentration of Zn ferrites for samples measured in water and PEG 8K.

### S6. Calculation of the distance between two MNPs uniformly spread in the whole volume:

Assuming that each MNP occupies the same cubic volume with the edge  $d$  (which is also the center to center distance between the MNPs), the volume of the cube is:

$$d^3 = V/N$$

where  $V$  is the whole volume of the colloid and  $N$  is the number of MNPs.  $N$  is equal to  $m/m_0$  where  $m$  is the mass of all MNPs and  $m_0$  is the mass of a single MNP.  $m_0$  can be expressed from the density and the volume as:

$$m_0 = \rho v = \rho \pi D^3/6$$

where  $D$  is the diameter of the MNP. After simple algebraic calculation one can obtain:

$$d = D(\pi/6\phi)^{1/3} = D(\rho\pi/6c)^{1/3} = 0.8c^{-1/3}D$$

where  $\phi$  stands for the volume fraction of the MNPs and  $c$  is the mass/volume concentration of the colloid.

For the highest concentration used in this study  $2 \text{ mg}_{\text{Fe}}/\text{mL}$ , we obtained  $d = 9.4 D$ .

### S7. Calculation of $K_{\text{eff}}$ for samples aligned with the magnetic field and randomly oriented:

For MNPs aligned with the field lines of the external AMF, the following equation was shown to provide the best fit for numerical simulation with AC hysteresis loops [1]:

$$\mu_0 H_{\text{CHyp}} M_s = 1.85 K_{\text{eff}} \left\{ 1 - \left[ \frac{k_B T}{KV} \ln \left( \frac{k_B T}{4\mu_0 H_{\text{CHyp}} M_s V f \tau_0} \right) \right]^{0.8} \right\} \quad (\text{S1})$$

while in the case of randomly oriented MNPs the numerical factor is changed as follows:

$$\mu_0 H_{\text{CHyp}} M_s = 0.926 K_{\text{eff}} \left\{ 1 - \left[ \frac{k_B T}{KV} \ln \left( \frac{k_B T}{4\mu_0 H_{\text{CHyp}} M_s V f \tau_0} \right) \right]^{0.8} \right\} \quad (\text{S2})$$

The fitting parameters used were:  $T = 300 \text{ K}$ ,  $V = 10^{-23} \text{ m}^3$ ,  $f = 355 \text{ kHz}$ ,  $\tau_0 = 10^{-10} \text{ s}$  and  $M_s = 380 \text{ kA/m}$ .

## S8.TEM Images of the MNPs aligned under a DC magnetic field of 10 kA/m

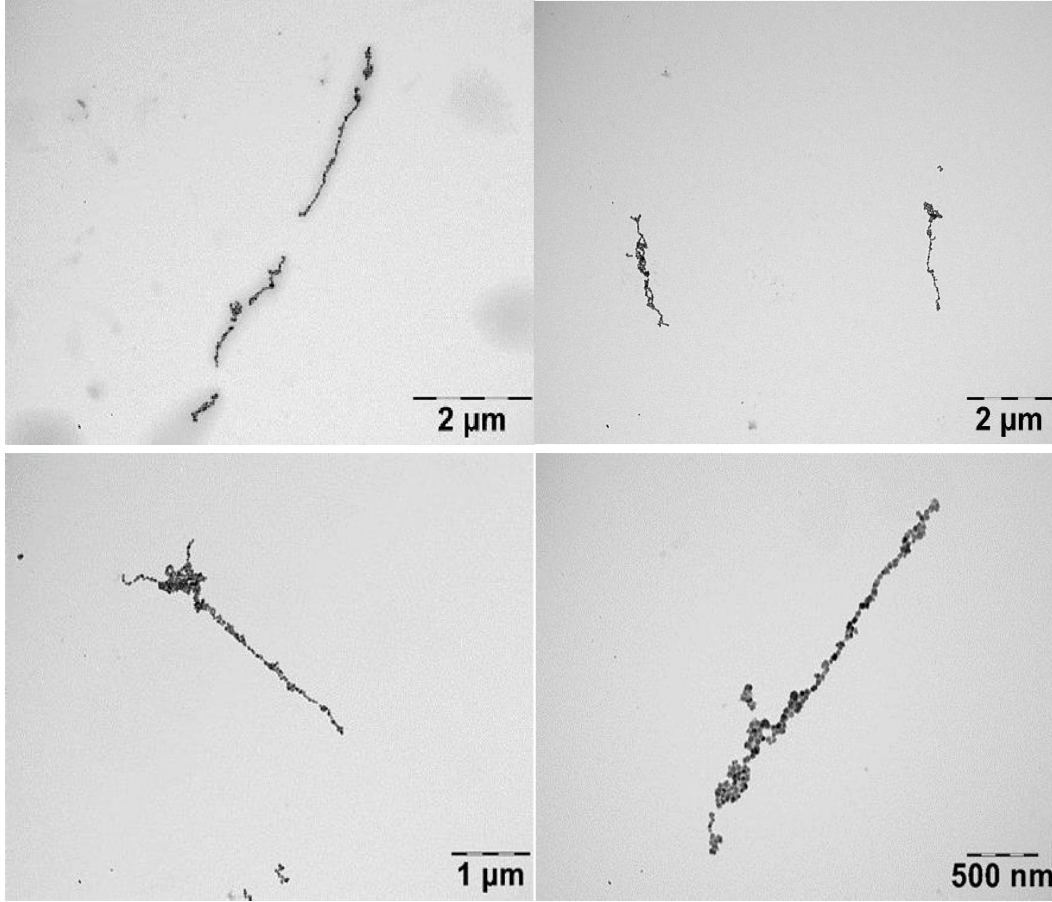

**Figure S7.** MNPs align themselves in chain under a static DC of 10 kA/m at different magnifications. The samples were disposed on the TEM grid and were allowed to dry under the influence of the DC field.

## S9. Fitting parameters for MH data acquired in water with and without $H_{DC}$ of 10 kA/m:

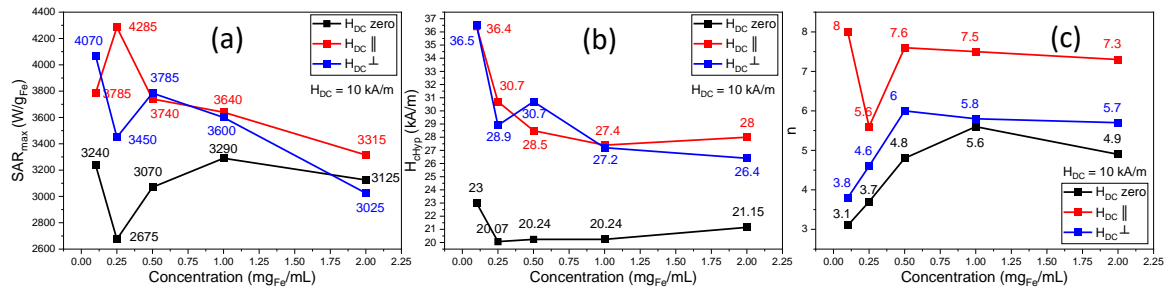

**Figure S8.** (a) The SAR<sub>max</sub>, (b)  $H_{chyp}$ , and (c) exponent  $n$  dependence on concentration for samples dispersed in water measured with and without an  $H_{dc}$  of 10 mT oriented parallel or perpendicular to the AMF lines

### S10. Fitting parameters for MH data acquired in water with an $H_{DC}$ of 20 kA/m:

**Table S1.**  $SAR_{max}$ ,  $H_{cHyp}$ , and  $n$  parameters for MH data under an  $H_{DC}$  of 20 kA/m.

| Concentration<br>(mg <sub>Fe</sub> /mL) | $H_{DC}$ parallel                   |                      |     | $H_{DC}$ perpendicular              |                      |     |
|-----------------------------------------|-------------------------------------|----------------------|-----|-------------------------------------|----------------------|-----|
|                                         | $SAR_{max}$<br>(W/g <sub>Fe</sub> ) | $H_{cHyp}$<br>(kA/m) | $n$ | $SAR_{max}$<br>(W/g <sub>Fe</sub> ) | $H_{cHyp}$<br>(kA/m) | $n$ |
| 0.5                                     | 3787                                | 33.8                 | 8.9 | 2048                                | 39.0                 | 3.9 |
| 1                                       | 3757                                | 35.0                 | 8.8 | 1943                                | 38.3                 | 5   |

### S11. Fitting parameters for MH data acquired on samples randomly immobilized in PEG 8K:

**Table S2.**  $SAR_{max}$ ,  $H_{cHyp}$ , and  $n$  for MH data for samples randomly immobilized in PEG 8K and submitted to the AMF and an  $H_{DC}$  of 10 kA/m both in parallel and perpendicular configurations.

| $c$<br>(mg <sub>Fe</sub> /mL) | $H_{DC}$ | $H_{cHyp}$<br>(kA/m) | $SAR_{max}$<br>(W/g <sub>Fe</sub> ) | $n$ |
|-------------------------------|----------|----------------------|-------------------------------------|-----|
| 2                             | 0        | 24.2                 | 1210                                | 3.9 |
| 2                             | II       | 28.5                 | 1185                                | 4.3 |
| 2                             | I        | 25.2                 | 1125                                | 3.9 |
| 1                             | 0        | 27.1                 | 1480                                | 4.1 |
| 1                             | II       | 30.5                 | 1410                                | 4.7 |
| 1                             | I        | 26.5                 | 1330                                | 3.9 |
| 0.5                           | 0        | 28.9                 | 1535                                | 4.3 |
| 0.5                           | II       | 32.3                 | 1520                                | 4.5 |
| 0.5                           | I        | 28.6                 | 1430                                | 4.0 |
| 0.25                          | 0        | 27.4                 | 1040                                | 4.0 |
| 0.25                          | II       | 31.8                 | 1040                                | 4.5 |
| 0.25                          | I        | 28.5                 | 1025                                | 3.6 |
| 0.1                           | 0        | 29.7                 | 830                                 | 4.9 |
| 0.1                           | II       | 34.5                 | 800                                 | 6.3 |
| 0.1                           | I        | 30.9                 | 800                                 | 4.0 |

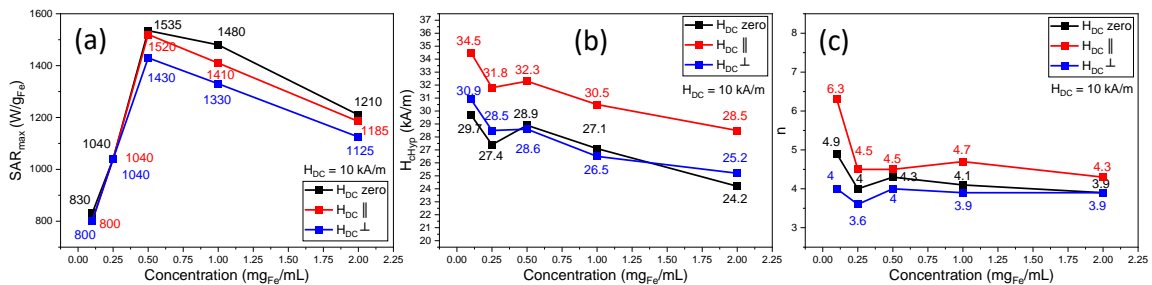

**Figure S9.** (a) The  $SAR_{max}$ , (b)  $H_{cHyp}$ , and (c) exponent  $n$  dependence on concentration for samples immobilized in solid PEG 8K measured with and without an  $H_{DC}$  of 10 mT oriented parallel or perpendicular to the AMF lines.



**S12. Influence of the pre-alignment of the MNPs before immobilization on SAR and the effects of the  $H_{DC}$  on pre-aligned samples:**

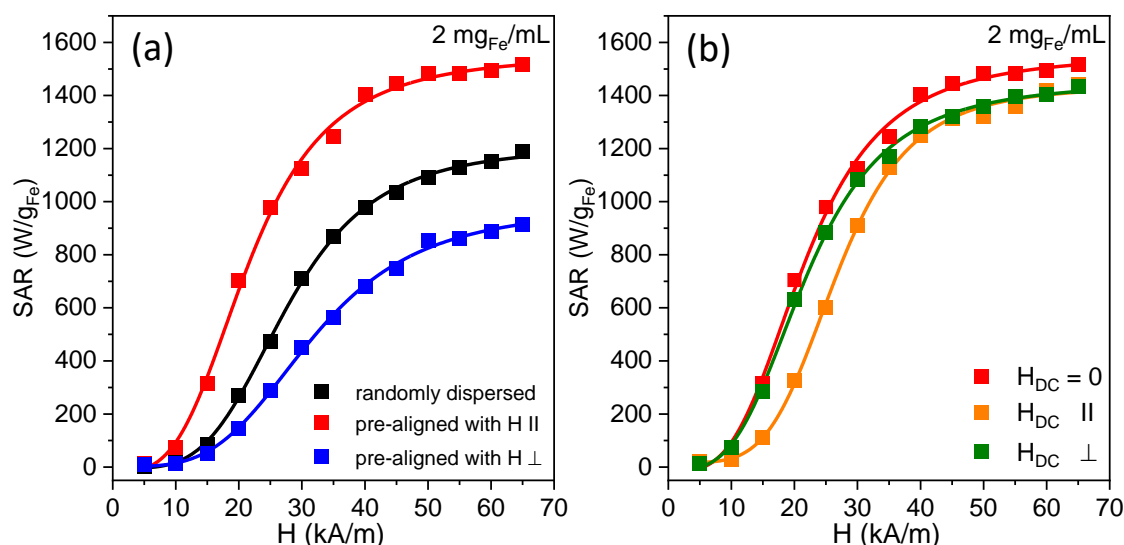

**Figure S10.** SAR dependence on  $H$  for immobilized Zn ferrites in PEG 8K, at a concentration of 2 mg<sub>Fe</sub>/mL, randomly distributed and pre-aligned with an  $H_{DC}$  of 65 kA/m either parallel or perpendicular to AMF lines (a) and pre-aligned with a parallel  $H_{DC}$  of 65 kA/m without and with an  $H_{DC}$  of 10 kA/m superposed on AMF both in parallel and perpendicular configurations (b).

**Table S3.**  $SAR_{max}$ ,  $H_{cHyp}$ , and  $n$  parameters for MH data from Figure S7.

| Condition                                | $H_{DC} = 0$ kA/m                   |                      |      | $H_{DC}$ parallel                   |                      |      | $H_{DC}$ perpendicular              |                      |      |
|------------------------------------------|-------------------------------------|----------------------|------|-------------------------------------|----------------------|------|-------------------------------------|----------------------|------|
|                                          | $SAR_{max}$<br>(W/g <sub>Fe</sub> ) | $H_{cHyp}$<br>(kA/m) | $n$  | $SAR_{max}$<br>(W/g <sub>Fe</sub> ) | $H_{cHyp}$<br>(kA/m) | $n$  | $SAR_{max}$<br>(W/g <sub>Fe</sub> ) | $H_{cHyp}$<br>(kA/m) | $n$  |
| Pre-aligned<br>with $H$<br>parallel      | 1555                                | 17.97                | 3.34 | 1450                                | 18.31                | 3.37 | 1435                                | 24.27                | 4.55 |
| Pre-aligned<br>with $H$<br>perpendicular | 980                                 | 27.44                | 3.69 |                                     |                      |      |                                     |                      |      |

**References:**

1. Mehdaoui, B.; Tan, R. P.; Meffre, A.; Carrey, J.; Lachaize, S.; Chaudret, B.; Respaud, M. Increase of magnetic hyperthermia efficiency due to dipolar interactions in low-anisotropy magnetic nanoparticles: Theoretical and experimental results. *Physical Review B* **2013**, *87*, 174419. <https://doi.org/10.1103/PhysRevB.87.174419>
